# Supplementary material for: Strong antiferromagnetic coupling of the cobalt(ii)–semiquinone radical in a dinuclear complex with 2,2′-bipyrimidine ligands
Source: Royal Society of Chemistry journal article supplement (doi:10.1039/d0nj00767f), 2020-01-01
Supplement: d0nj00767f1.pdf [file d0nj00767f1.pdf]

## Supporting Information for

# Strong antiferromagnetic coupling of the cobalt(II)–semiquinone radical in a dinuclear complex with 2,2'-bipyrimidine ligands

Jin-Hua Wang,<sup>a</sup> Jing-Wei Dai,<sup>b</sup> Zhao-Yang Li,<sup>\*a</sup> and Masahiro Yamashita<sup>a,c,d</sup>

<sup>a</sup>*School of Materials Science and Engineering, Nankai University, 38 Tongyan Road, Haihe Educational Park, Jinnan District, Tianjin 300350, P. R. China*

<sup>b</sup>*State Key Laboratory of Medicinal Chemical Biology, Nankai University, 94 Weijin Road, Nankai District, Tianjin 300071, P. R. China*

<sup>c</sup>*WPI-Advanced Institute for Materials Research (AIMR), Tohoku University, 2-1-1 Katahira, Aoba-ku, Sendai 980-8577, Japan*

<sup>d</sup>*Department of Chemistry, Graduate School of Science, Tohoku University, 980-8578 Sendai, Japan*

*E-mail: zhaoyang@nankai.edu.cn (Z. Y. Li)*

### 1. General methods

#### 1.1 Materials and methods

The reagents and solvents used were commercially available and without further purification. Thermogravimetric analysis (TGA) was carried out on a Rigaku standard TG-DTA analyzer from room temperature to 700 °C in argon atmosphere with a heating rate of 10 °C min<sup>-1</sup>. Elemental analysis (C, H, and N) was performed on a vario EL cube elemental analyzer. Powder X-ray diffraction (PXRD) was performed on a Rigaku Miniflex 600 at room temperature. The direct current magnetic susceptibilities were measured for polycrystalline samples on a Quantum Design superconducting quantum interference device (SQUID) magnetometer operated between 1.8 and 300 K.

## 1.2 X-ray crystallography

Powder X-ray diffraction (PXRD) measurements were performed on a Rigaku Miniflex 600 at room temperature. The single-crystal XRD study of complex **1** was performed on a Rigaku diffractometer equipped with charge-coupled device (CCD) area detector with a graphite monochromator. The unit cell parameters and full data set were obtained using Cu- $K_{\alpha}$  radiation ( $\lambda = 1.54 \text{ \AA}$ ). The data were corrected by a semi-empirical method using SADABS. SAINT was used for data integration. The structure was solved by direct methods using SHELXS and refined with SHELXL of the SHELXTL-97 package <sup>1</sup>. The final refinements were performed by using full matrix least-squares method with anisotropic thermal parameters for non-hydrogen atoms on  $F^2$ . The uncoordinated solvent molecules were disordered and were removed using the SQUEEZE algorithm in PLATON <sup>2</sup>. The results of this treatment are appended to the CIF file. A summary of the crystallographic data and structure refinement of **1** are listed in Table 1. Selected bond lengths and angles are given in Table 2.

## 2. X-ray structure determination

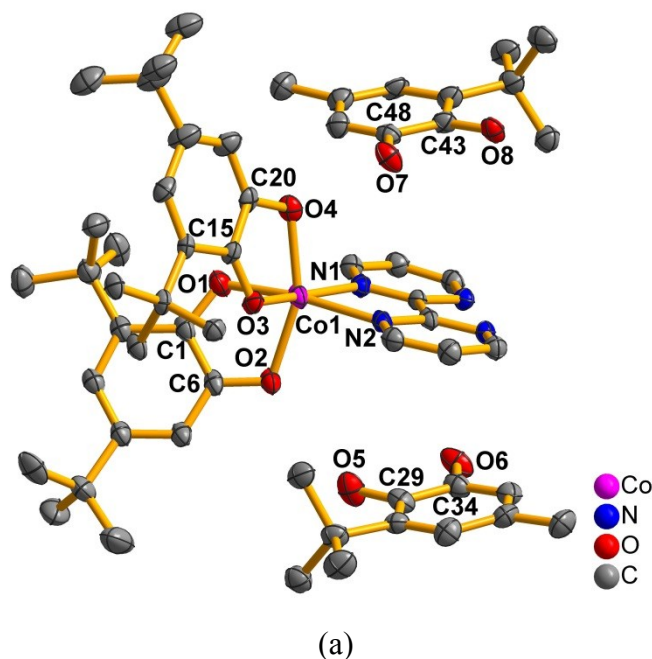

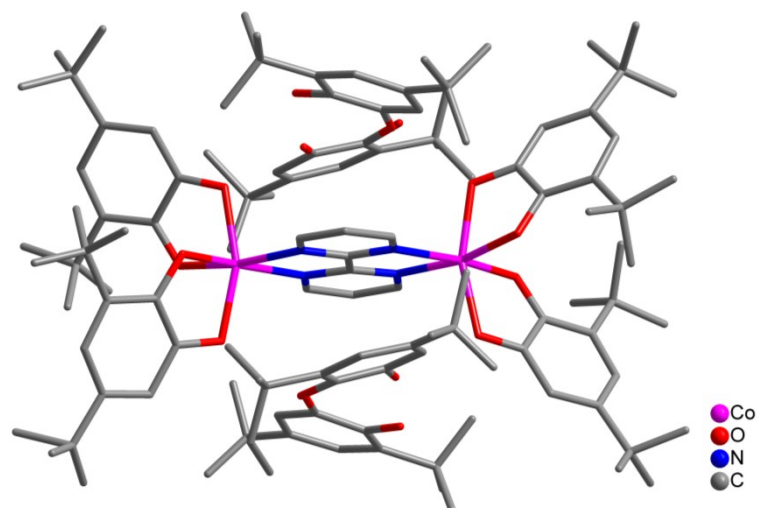

(b)

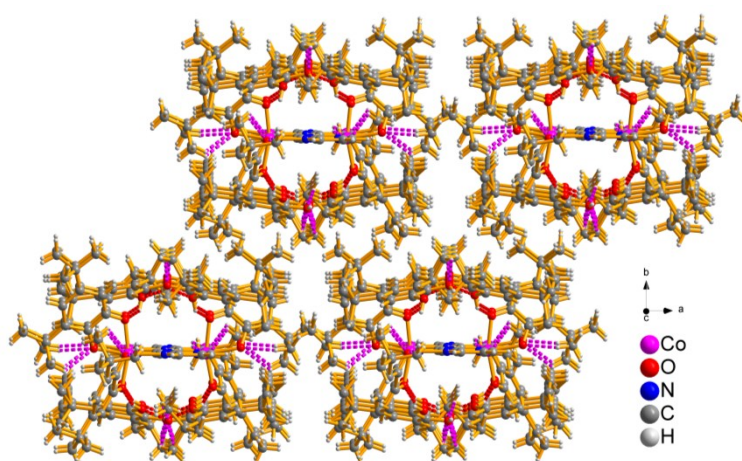

(c)

**Fig. S1** (a) A perspective view of the coordination geometry of **1** at 100 K (Thermal ellipsoids are drawn at the 30% probability level). (b) The molecular structure of **1**. (c) Packing diagram of the dinuclear units in complex **1**.

**Table S1** Hydrogen bond geometries in the crystal structures at 100 K for **1**.

| D–H···A             | H···A (Å) | D···A (Å) | D–H···A(°) |
|---------------------|-----------|-----------|------------|
| O5–H5B···O2         | 1.65      | 2.465(16) | 163        |
| O6–H6···O5          | 1.92      | 2.666(8)  | 147'       |
| O7–H7···O4          | 1.82      | 2.641(12) | 164        |
| O8–H8···O7          | 2.04      | 2.731(7)  | 139'       |
| Intra-C9–H9C···O1   | 2.45      | 3.143(11) | 127        |
| Intra-C10–H10A···O1 | 2.38      | 3.089(10) | 128        |
| Intra-C22–H22C···O3 | 2.34      | 2.997(15) | 124        |
| Intra-C24–H24A···O3 | 2.39      | 3.011(12) | 120        |
| Intra-C38–H38C···O6 | 2.43      | 3.059(7)  | 121        |
| Intra-C51–H51C···O8 | 2.22      | 2.880(6)  | 123        |

### 3. Infrared spectroscopy

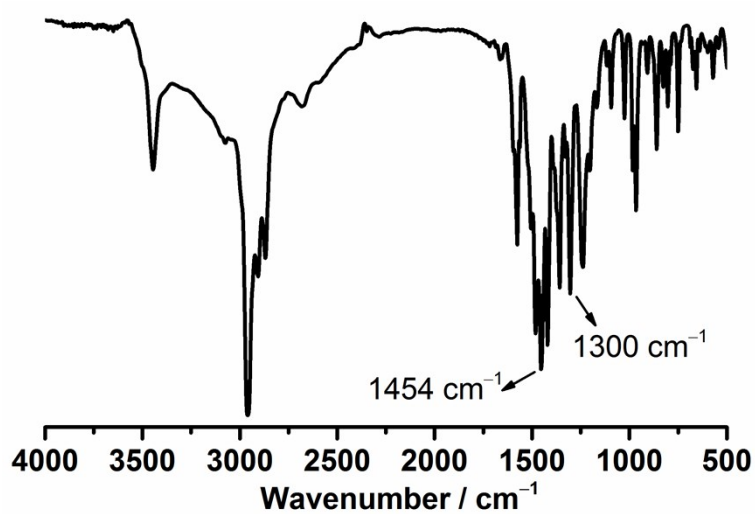**Fig. S2** IR spectra between 500 and 4000 cm<sup>-1</sup> for complex **1**.

#### 4. Thermogravimetric analysis (TGA)

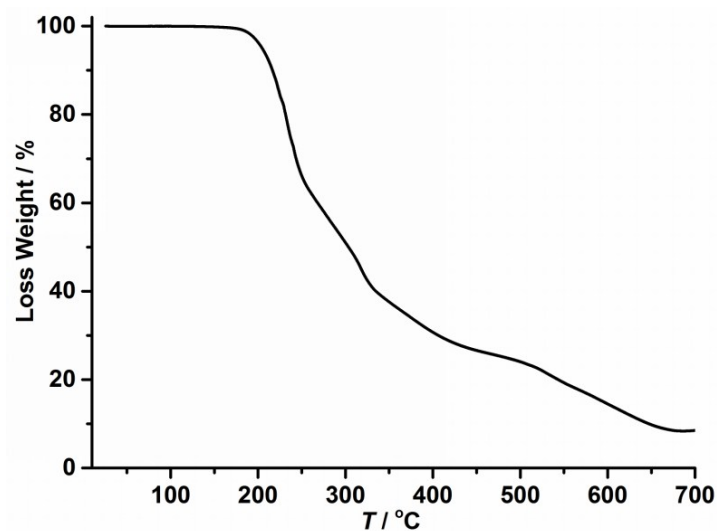

Fig. S3 TGA curve of 1.

#### 5. Magnetic properties

**Table S2** Selected antiferromagnetic coupling between 3d metal ions and semiquinone radical.

| M (3d) – R (semiquinone radical) | $J$                      | Ref       |
|----------------------------------|--------------------------|-----------|
| Cu(II) – R                       | $-64.0 \text{ cm}^{-1}$  | 3         |
| Fe(II) – R                       | $-83 \text{ cm}^{-1}$    | 4         |
| Fe(II) – R                       | $-127 \text{ cm}^{-1}$   | 5         |
| Fe(III) – R                      | $-206 \text{ cm}^{-1}$   | 6         |
| Mn(II) – R                       | $-41.3 \text{ cm}^{-1}$  | 7         |
| Ni(II) – R                       | $-87.8 \text{ cm}^{-1}$  | 7         |
| Ni(II) – R                       | $-364 \text{ cm}^{-1}$   | 8         |
| Ni(II) – R                       | $-382 \text{ cm}^{-1}$   | 5         |
| Ni(II) – R                       | $-320 \text{ cm}^{-1}$   | 5         |
| Co(II) – R                       | $-18 \text{ cm}^{-1}$    | 9         |
| Co(II) – R                       | $0 \text{ cm}^{-1}$      | 10        |
| Co(II) – R                       | $-7 \text{ cm}^{-1}$     | 11        |
| Co(II) – R                       | $-594 \text{ cm}^{-1}$   | 12        |
| Co(II) – R                       | $-90.25 \text{ cm}^{-1}$ | This work |

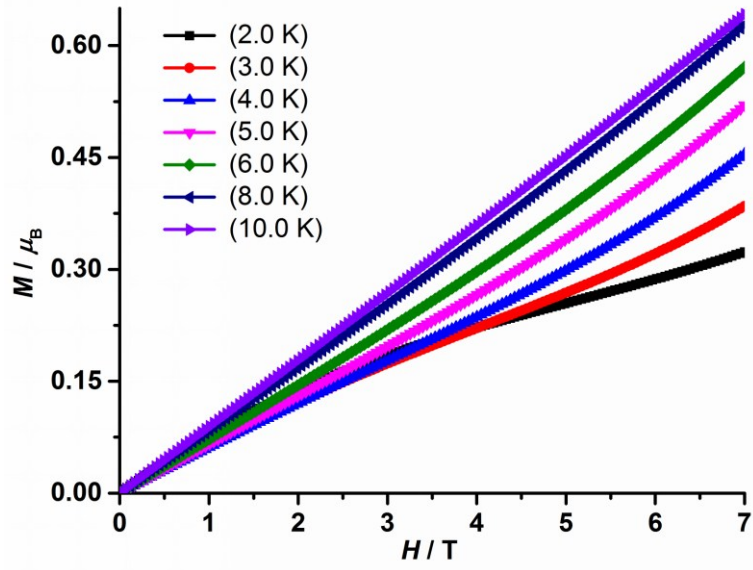

(a)

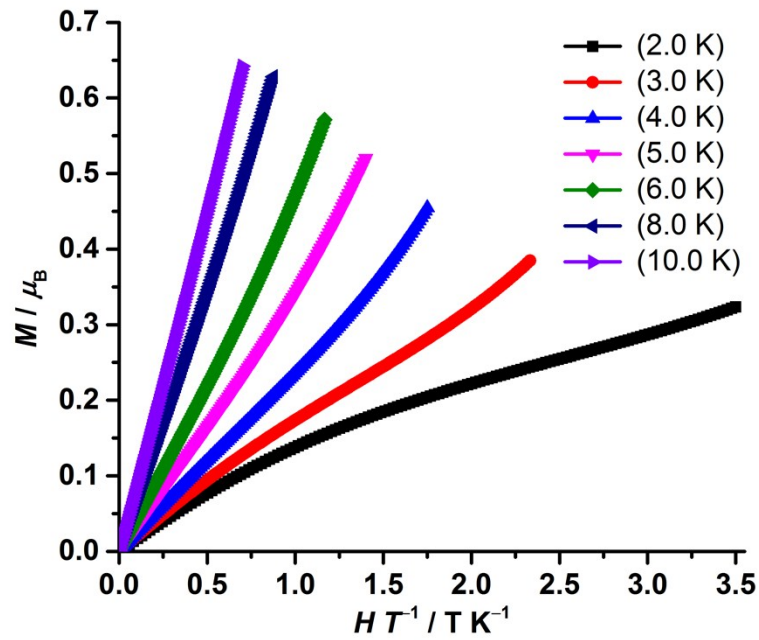

(b)

**Fig. S4** (a) SQUID magnetization  $M$  ( $\mu_B$ ) plotted versus external magnetic field  $H$  (T) plot under 2.0–10.0 K for **1**. (b)  $M$  vs.  $H/T$  data plot in the range of 0–7 T under 2.0–10.0 K for **1**.

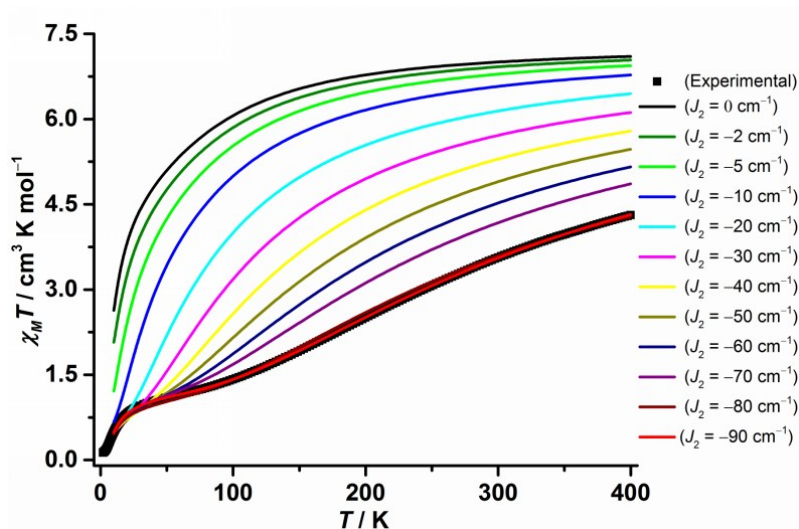

**Fig. S5** The  $\chi_M T$  vs.  $T$  simulations for **1** where the  $g_R = 2.0$ ,  $g_{\text{CoII}} = 2.49$ ,  $D_{\text{CoII}} = 87.41 \text{ cm}^{-1}$ ,  $zJ' = 0.02 \text{ cm}^{-1}$ ,  $J_1 = -2.67 \text{ cm}^{-1}$  and  $J_3 = -2.14 \text{ cm}^{-1}$  were fixed and the  $J_2$  values were varied (lines).

## 6. References

1. G. M. Sheldrick, *Acta Crystallogr. A*, **2008**, 64, 112-122.
2. A. L. Spek, *J. Appl. Crystallogr.*, **2003**, 36, 7-13.
3. R. Rakshit, S. Ghorai, S. Biswas and C. Mukherjee, *Inorg. Chem.*, **2014**, 53, 3333-3337.
4. A. E. Baum, S. V. Lindeman and A. T. Fiedler, *Chem. Commun.*, **2013**, 49, 6531-6533.
5. P. Wang, T. Qiu, G. P. A. Yap, J. Rosenthal, C. G. Riordan, M. M. Killian, T. C. Brunold, M. R. Saber, K. R. Dunbar and C. V. Popescu, *Inorg. Chem.*, **2017**, 56, 10481-10495.
6. P. Mialane, E. Anxolabehere-Mallart, G. Blondin, A. Nivorjkiene, J. Guilhem, L. Tchertanova, M. Cesario, N. Ravi, E. Bominaar, J.-J. Girerd and E. Munck, *Inorg. Chim. Acta*, **1997**, 263, 367-378.
7. D. A. Shultz, K. E. Vostrikova, S. H. Bodnar, H.-J. Koo, M.-H. Whangbo, M. L. Kirk, E. C. Depperman and J. W. Kampf, *J. Am. Chem. Soc.*, **2003**, 125, 1607-1617.
8. C. Cox, D. Isaacs, M. A. Bezpalko, W. S. Kassel, M. T. Kieber-Emmons and W. G. Dougherty, *Polyhedron*, **2019**, 162, 165-170.
9. T. Tezgerevska, E. Rousset, R. W. Gable, G. N. L. Jameson, E. C. Sanudo, A. Starikova and C. Boskovic, *Dalton Trans.*, **2019**, 48, 11674-11689.
10. N. A. Protasenko, A. I. Poddel'sky, A. S. Bogomyakov, N. V. Somov, G. A. Abakumov and

V. K. Cherkasov, *Polyhedron*, **2013**, 49, 239-243.

11. A. Witt, F. W. Heinemann, S. Sproules and M. M. Khusniyarov, *Chem. Eur. J.*, **2014**, 20, 11149-11162.
12. D. M. Adams, L. Noodleman and D. N. Hendrickson, *Inorg. Chem.*, **1997**, 36, 3966-3984.
